# Supplementary material for: Aminosubstituted tert-butylsulfinylferrocenes as a new family of chiral ligands: asymmetric addition of diethylzinc to aldehydes
Source: Royal Society of Chemistry journal article supplement (doi:10.1039/b105962a), 2001-01-01
Supplement: b105962a.doc [file b105962a.doc]

**Supplementary** **data**

**1-Aminosubstituted *t*-Butylsulfinylferrocenes as a New Family of Chiral Ligands: Asymmetric Addition of Diethylzinc to Aldehydes**

Julián Priego,a Olga García Mancheño,a Silvia Cabrera,a Juan Carlos Carretero*a

*a Departamento de Química Orgánica. Facultad de Ciencias. Universidad Autónoma de Madrid. 28049. Madrid. Spain; Fax: 34 91 3973966; Tel: 34 91 3973925; E-mail: juancarlos.carretero@uam.es*

**Synthesis of (*RS*)-*tert*-Butylsulfinylferrocene (1)**[[1]](#footnote-2)

To a cold solution (0 ºC) of ferrocene (6.17 g, 33.18 mmol) in THF (50 mL) was added *t*-BuLi 1.7 M in pentane (17 mL, 28.75 mmol) under argon. The reaction mixture was stirred at 0 ºC for 2 h and then a solution of (*R*)-*tert*-butyl *tert*-butanethiosulfinate[[2]](#footnote-3) (4.30 g, 22,12 mmol) in THF (20 mL) was added. The reaction was warmed to rt and then kept at this temperature for 2 h. Brine (20 mL) was added, the organic layer was separated and the aqueous layer was extracted with Et2O (2 x 30 mL). The combined organic layers were dried (MgSO4), filtered and the solvent was evaporated. The resulting mixture was purified by flash chromatography (ethyl acetate-hexane 2:1) to afford sulfoxide (*R*)-**1** (2.52 g, 40%), which was recrystallized from diethyl ether and hexane (1:1) to afford 1.25 g of pure sulfoxide (*R*)-**1** (ee = 99%, HPLC: Daicel Chiracel OD, *i*-PrOH/Hexane 2/98, flow rate 0.70 mL/min, *t*R:19.3 min (*R*)-isomer and 24.3 min (*S*)-isomer, detection at 254 nm).

**Mp**. 150-151 ºC; **[D20**= -355 (c= 0.5, CHCl3), 99% ee; Lit.Error: Reference source not founda **[D20**= -339 (c= 0.5, CHCl3), 95% ee; **1H NMR (200 MHz):** 4.68 (m, 1H, Cp-H), 4.41 (m, 2H, Cp-H), 4.38 (s, 5H, Cp’-H), 4.35 (m, 1H, Cp-H), 1.12 (s, 9H, *t-*Bu).

**Synthesis of (*RFc, RS*)-2-Amino-1-(*tert*-butylsulfinyl)ferrocene (2a)**

To a cold solution (0 ºC) of sulfoxide **1** (1.38 g, 4.76 mmol) in THF (35 mL) was added *n*-BuLi 1.9 M in pentane (3.43 mL, 6.19 mmol) under argon. The mixture was stirred at rt for 2 h and then a solution of tosyl azide (1.22 g, 6.19 mmol) was added at 0 ºC. The resulting solution was stirred at rt for 4 h and a solution of Bu4N+I- (0.70 g, 1.90 mmol) and NaBH4 (0.72 g, 19 mmol) in H2O (10 mL) was added. The reaction mixture was stirred at rt for 24 h and then a second solution of NaBH4 (0.36 g, 9.5 mmol) in H2O (5 mL) was added. After 24 h brine was added, the organic layer was separated and the aqueous layer was extracted with Et2O (2 x 30 mL). The combined organic layers were dried (MgSO4), filtered and the solvent was evaporated. The resulting mixture was purified by flash chromatography (ethyl acetate-CH2Cl2 1:3) to afford the aminosulfoxide

**2a** (0.93 g, 64%, ee > 98%, HPLC: Daicel Chiralpak AS, *i*-PrOH/Hexane 5/95, flow rate 0.70 mL/min, *t*R 9.9 min (*S*)-isomer and 12.2 min (*R*)-isomer, detection at 254 nm).

**Mp.** 163º- 164ºC. **[D20**= -343 (c= 0.1, CHCl3). **1H NMR (200 MHz)**: 4.27 (s, 5H, Cp´-H), 4.09 (t, 1H, *J*= 1.8 Hz, Cp-H), 4.01 (m, 1H, Cp-H), 3.98 (t, 1H, *J*= 2.5 Hz, Cp-H), 3.64 (bs, 2H, NH2), 1.20 (s, 9H, *t-*Bu). **13C-RMN**: 108.5, 70.7, 70.0, 64.6, 64.2, 58.6, 57.0, 23.1. **MS (EI)**: *m*/*z* (%)= 305 (M+, 6), 249 (8), 231 (26), 178 (5), 149 (51), 97 (28), 91 (13), 84 (44), 81 (40), 71 (46), 69 (85), 57 (100). **Anal. Calcd for** **C14H19FeNOS**: C, 55.09; H, 6.27; N, 4.59; S, 10.50. **Found**: C, 54.69; H, 6.02; N, 4.28; S, 10.61.

**Synthesis of (*RFc, RS*)- 1-(*tert*-Butylsulfinyl)-2-[*N*,*N*-(dimethyl)amino]ferrocene (2b)**

To a solution of amine **2a** (0.20 g, 0.65 mmol) in DMF (7 mL) at rt was added NaH (0.10 g, 2.62 mmol). The resulting solution was stirred for 30 min and MeI (0.92 g, 6.50 mmol) was added. The reaction mixture was stirred for 12 h and water was added. The organic layer was separated and the aqueous layer was extracted with Et2O (2 x 30 mL). The combined organic layers were dried (MgSO4), filtered and the solvent was evaporated. The resulting mixture was purified by flash chromatography (ethyl acetate-hexane 1:6) to afford the amine **2b** (0.12 g, 57%).

**Mp.** 133º-134ºC. **[D20**= -540 (c= 0.1, CHCl3). **1H NMR (200 MHz):** 4.48 (s, 5H, Cp´-H), 4.18 (m, 2H, Cp-H), 4.06 (t, 1H, *J*= 2.6 Hz, Cp-H), 2.73 (s, 6H, 2 Me), 1.17 (s, 9H, *t*-Bu). **13C NMR**: 113.8, 72.2, 70.6, 68.4, 63.5, 63.3, 57.4, 44.8, 24.3. **MS** **(EI)**: *m*/*z* (%)= 333 (M+, 35), 317 (12), 277 (34), 259 (26), 246 (12), 149 (18), 139 (93), 138 (67), 97 (22), 84 (100), 69 (45), 57 (51). **Anal. Calcd for C16H23FeNOS**: C, 57.66; H, 6.96; N, 4.20 ; S, 9.62 . **Found**: C, 57.27; H, 6.90; N, 4.09; S, 9.88.

**General procedure for the synthesis of the amides 2c-f. Synthesis of (*RFc, RS*)-2-(*N*-acetyl)amino-1-(*tert*-butylsulfinyl)ferrocene (2c)**

To a solution of amine **2a** (149 mg, 0.49 mmol) in pyridine (1 mL) was added Ac2O (100 mg, 0.98 mmol) at 0 ºC. The reaction mixture was stirred for 2 h and was diluted with water (1 mL). The pyridine was removed under vacuum and the aqueous layer was extracted with ethyl acetate (2 x 4 mL). The combined organic layers were dried (Na2SO4), filtered and evaporated. The resulting mixture was purified by flash chromatography (ethyl acetate-hexane 1:3) to afford amide **2c** (166 mg, 98%).

**Mp.** 138º- 139ºC. **[D20**= -1119 (c= 0.08, CHCl3). **1H NMR (300 MHz):** 9.06 (s, 1H, NH), 5.50 (m, 1H, Cp-H), 4.31 (s, 5H, Cp´-H), 4.17 (t, 1 H, *J*= 2.5 Hz, Cp-H), 4.08 (dd, 1H, *J*= 2.4, 1.2 Hz, Cp-H), 2.01 (s, 3H, Me), 1.16 (s, 9H, *t*-Bu). **13C NMR:** 168.4, 97.0, 71.2, 70.1, 66.2, 65.4, 64.7, 57.0, 24.3, 22.7. **MS (EI)**: *m*/*z* (%)= 347 (M+, 70), 331 (11), 291 (92), 273 (35), 232 (87), 208 (37), 165 (100), 121 (32), 57(60). **Anal. Calcd for C16H21FeNO2S:** C, 55.34; H, 6.10; N, 4.03; S, 9.23. **Found**: C, 55.45; H, 5.98; N, 3.90; S, 9.52.

## (*RFc, RS*)-1-(*tert*-Butylsulfinyl)-2-[*N*-(trifluoroacetyl)amino]ferrocene (2d)

#### Acylating reagent: (CF3CO)2O

Eluent: ethyl acetate-hexane (1:6). Yield: 74%.

**Mp.** 126º- 128ºC. **[D20**= -1461 (c= 0.08, CHCl3). **1H NMR (300 MHz):** 10.35 (s, 1H, NH), 5.53 (dd, 1H, *J*= 2.6, 1.4 Hz, Cp-H), 4.39 (s, 5H, Cp´-H), 4.31 (t, 1H, *J*= 2.8 Hz, Cp-H), 4.22 (dd, 1H, *J*= 2.6, 1.4 Hz, Cp-H), 1.20 (s, 9H, *t*-Bu). **13C NMR** : 210.3, 138.2, 94.6, 71.7, 71.5, 67.0, 65.6, 65.3, 57.4, 22.6. **MS (EI)**: *m*/*z* (%)= 401 (M+, 36), 385 (3), 345 (72), 327 (100), 262 (11), 230 (14), 138 (34), 121 (20), 57 (52). **Anal. Calcd for C16H18F3FeNO2S**: C, 47.90; H, 4.52; N, 3.49; S, 7.99. **Found**: C, 48.11; H, 4.36; N, 3.49; S, 8.12.

## (*RFc, RS*)-1-(*tert*-Butylsulfinyl)-2-[*N*-(trimethylacetyl)amino]ferrocene (2e)

#### Acylating reagent: (*t*-BuCO)2O

Eluent: ethyl acetate-hexane (1:6). Yield: 76%.

**[D20**= -754 (c= 0.7, CHCl3). **1H NMR (300 MHz):** 9.45 (s, 1H, NH), 5.58 (m, 1H, Cp-H), 4.27 (s, 5H, Cp´-H), 4.17 (t, 1 H, *J*= 2.7 Hz, Cp-H), 4.07 (m, 1H, Cp-H), 1.21 (s, 9H, *t*-Bu). **13C NMR** : 177.3, 97.8, 71.1, 70.0, 66.2, 64.7, 57.0, 39.2, 27.3, 22.7. **Anal. Calcd for C19H27FeNO2S**: C, 58.60; H, 7.00; N,3.60; S, 8.20. **Found**: C, 58.49; H, 7.24; N, 3.30; S, 7.83.

## (*RFc, RS*)-2-(*N*-Benzoyl)amino-1-(*tert*-butylsulfinyl)ferrocene (2f)

#### Acylating reagent: (PhCO)2O

Eluent: ethyl acetate-hexane (1:6). Yield: 80%.

**[D20**= -853 (c= 0.9, CHCl3). **1H NMR (300 MHz):** 10.24 (s, 1H, NH), 7.92 (m, 2H, Ar), 7.50 (m, 3H, Ar), 5.74 (m, 1H, Cp-H), 4.36 (s, 5H, Cp´-H), 4.28 (t, 1H, *J*= 2.7 Hz, Cp-H), 4.17 (m, 1H, Cp-H), 1.21 (s, 9H, *t*-Bu). **13C NMR** : 164.7, 133.7, 131.6, 128.7, 126.9, 97.5, 71.3, 70.3, 66.4, 65.2, 64.8, 57.1, 22.7, 14.1. **Anal. Calcd for C21H23FeNO2S**: C, 61.60; H, 5.70; N,3.40; S, 7.80. **Found**: C, 61.34; H, 5.85; N, 3.12; S, 7.33.

**General procedure for the synthesis of sulfonamides 2g-l. Synthesis of (*RFc, RS*)-1-(*tert*-Butylsulfinyl)-2-[*N*-(*p*-tolylsulfonyl)amino]ferrocene (2h).**

To a solution of amine **2a** (101 mg, 0.33 mmol) in CH3CN (3 mL) at rt was added NaH (12 mg, 0.5 mmol). The reaction mixture was stirred for 15 min and TsCl (189 mg, 0.99 mmol) was added. The resulting solution was stirred for 6 h, diluted with water (1 mL) and extracted with diethyl ether (2 x 5 mL). The combined organic extracts were dried (Na2SO4), filtered and evaporated. The resulting mixture was purified by flash chromatography (ethyl acetate-hexane 1:4) to afford sulfonamide **2h** (103 mg, 68%).

**Mp.** 154º- 155ºC. **[D20**= -522 (c= 0.1, CHCl3)  **1H NMR (300 MHz):** 8.57 (s, 1H, NH), 7.86 (d, 2H, *J*= 8.3 Hz, Ar), 7.32 (d, 2H, *J*= 8.1 Hz, Ar), 4.84 (dd, 1H, *J*= 2.6, 1.4 Hz, Cp-H), 4.10 (bs, 7H, 5 Cp´-H + 2 Cp-H), 2.42 (s, 3H, Me), 1.10 (s, 9H, *t*-Bu).  **13C NMR:** 143.8, 137.5, 129.7, 127.4, 99.0, 71.3, 68.2, 56.6, 64.8, 61.2, 57.0, 22.7, 21.5. **MS (EI)**: *m*/*z* (%)= 459 (M+, 61), 443 (36), 403 (99), 385 (71), 248 (60), 230 (67), 212 (100), 164 (62), 121 (44), 91 (48), 57(54). **Anal. Calcd for C21H25FeNO3S2**: C, 54.90; H, 5.49; N,3.05; S, 13.96. **Found**: C, 54.70; H, 5.35; N, 2.99; S, 13.7.

**(*RFc, RS*)-1-(*tert*-Butylsulfinyl)-2-[*N*-(*p*-methoxyphenylsulfonyl)amino]ferrocene (2i)**

Sulfonyl chloride: *p-*MeOC6H4SO2Cl

Eluent: ethyl acetate-hexane (1:4). Yield: 74%.

**Mp.** 160º- 161ºC. **[D20**= -476.3 (c= 0.1, CHCl3).  **1H NMR (300 MHz):** 8.51 (s, 1H, NH), 7.87 (d, 2H, *J*= 8.9 Hz, Ar), 6.98 (d, 2H, *J*= 8.9 Hz, Ar), 4.83 (dd, 1H, *J*= 2.6, 1.4 Hz, Cp-H), 4.12 (s, 5H, Cp´-H), 4.10 (m, 1H, Cp-H), 4.07 (dd, 1H, *J*= 2.6, 1.4 Hz, Cp-H), 3.84 (s, 3H, MeO), 1.09 (s, 9H, *t*-Bu). **13C NMR (75 MHz):** 163.0, 132.0, 129.4, 114.2, 99.0, 71.3, 68.1, 65.6, 64.8, 62.0, 56.9, 55.6, 22.7. **MS (EI)**: *m*/*z* (%)= 475 (M+, 63), 459 (62), 419 (89), 403 (63), 401 (59), 272 (24), 248 (69), 232 (91), 228 (100), 166 (75), 121 (40), 77 (24), 57 (62). **Anal. Calcd for C21H25FeNO4S2**: C, 53.05; H, 5.30; N, 2.95; S, 13.49. **Found**: C, 52.72; H, 4.98; N, 2.91; S, 13.19.

## (*RFc, RS*)-1-(*tert*-Butylsulfinyl)-2-[*N*-(*p*-nitrophenylsulfonyl)amino]ferrocene (2j)

Sulfonyl chloride: *p-*NO2C6H4SO2Cl

Eluent: ethyl acetate-hexane (1:4). Yield: 57%.

**Mp.** 181º- 182ºC. **[D20**= -776 (c= 0.05, CHCl3) **1H NMR (300 MHz):** 8.96 (s, 1H, NH), 8.34 (d, 2H, *J*= 8.5 Hz, Ar), 8.11 (d, 2H, *J*= 8.5 Hz, Ar), 4.96 (bs, 1H, Cp-H), 4.23 (s, 5H, Cp’-H), 4.18 (bs, 1H, Cp-H), 4.11 (bs, 1H, Cp-H), 1.03 (s, 9H, *t*-Bu). **13C NMR:** 150.1, 146.2, 128.4, 124.3, 98.1, 71.7, 68.3, 66.1, 65.2, 62.5, 56.7, 22.5. **MS (EI)**: *m*/*z* (%)= 490 (M+, 47), 434 (90), 416 (53), 248 (35), 230 (100), 166 (53), 121 (38), 57 (74). **Anal. Calcd for C20H22FeN2O5S2**: C, 48.99; H, 4.52; N, 5.71; S, 13.08. **Found**: C, 48.75; H, 4.25; N, 5.55; S, 12.76.

## (*RFc,RS*)-1-(*tert*-Butylsulfinyl)-2-[*N*-(2,4,6-trimethylphenylsulfonyl)amino]ferrocene (2k)

Sulfonyl chloride: (CH3)3C6H2SO2Cl

Eluent: ethyl acetate-hexane (1:2). Yield: 45%.

**Mp.** 186º- 187ºC. **[D20**= - 440 (c=1, CHCl3). **1H-RMN (300 MHz):** 8.77 (s, 1H, NH), 7.03 (s,2H, Ar), 4.57 (t, 1H, *J*= 2.0 Hz, Cp-H), 4.09 (m, 2H, Cp-H), 4.00 (s, 5H, Cp´-H), 2.78 (s, 6H, 2 Me), 2.31 (s, 3H, Me), 1.21 (s, 9H, *t*-Bu). **13C NMR:** 142.6, 139.3, 134.7, 132.2, 99.6, 70.83, 68.3, 65.5, 64.4, 60.9, 57.4, 23.0, 22.9, 21.0. **MS (EI)**: *m*/*z* (%)= 487 (M+, 53), 431 (61), 248 (100), 240 (71), 230 (63), 165 (43), 119 (35), 57 (36). **Anal. Calcd for C23H29FeNO3S2**: C, 56.67; H, 6.00; N, 2.87; S, 13.16. **Found**: C, 56.33; H, 5.90; N, 2.74; S, 12.99.

## (*RFc, RS*)-1-(*tert*-Butylsulfinyl)-2-[*N*-(1-naphthalenesulfonyl)amino]ferrocene (2l)

#### Sulfonyl chloride: 1-naphthalenesulfonyl chloride

Eluent: ethyl acetate-hexane (1:2). Yield: 64%.

**Mp.** 174º-175ºC. **[D20**= -329 (c= 0.2, CHCl3). **1H NMR (300 MHz):** 9.05 (s, 1H, NH), 8.70 (dd, 1H, *J*= 8.7, 0.6 Hz, Ar), 8.46 (dd, 1H, *J*= 7.5, 1.2 Hz, Ar), 8.12 (d, 1H, *J*= 8.3 Hz, Ar), 7.95 (d, 1H, *J*= 8.1 Hz, Ar), 7.80 (ddd , 1H, *J*= 8.5, 7.0, 1.4 Hz, Ar), 7.64 (dd, 1H, *J*= 8.1, 7.5 Hz, Ar), 7.62 (ddd ,1H, *J*= 8.1, 7.0, 1.1 Hz, Ar), 4.59 (t, 1H, *J*= 2.0 Hz, Cp-H), 4.03 (s, 1H, Cp-H), 4.02 (s, 1H, Cp-H), 3.66 (s, 5H, Cp’-H), 1.18 (s, 9H, *t*-Bu). **13C NMR:** 135.6, 134.6, 134.3, 129.7, 129.1, 128.8, 128.5, 127.3, 124.7, 124.2, 111.4, 110.4, 99.2, 70.6, 68.1, 65.6, 64.6, 57.4, 22.9. **MS (EI)**: *m*/*z* (%)= 495 (M+, 45), 479 (41), 439 (62), 248 (100), 232 (62), 166 (55), 57 (48). **Anal. Calcd for C24H25FeNO3S2**: C, 58.18; H, 5.09; N, 2.83; S, 12.94. **Found**: C, 58.10; H, 5.06; N, 2.71; S, 12.57.

**(*RFc, RS*)-1-(*tert*-Butylsulfinyl)-2-[*N*-(methanesulfonyl)amino]ferrocene (2g)**

Sulfonyl chloride: CH3SO2Cl. In this case Et3N (1.5 equiv) was used as base in CH2Cl2 as solvent.

Eluent: ethyl acetate-hexane (1:2). Yield: 62%.

**Mp.** 121º- 123ºC. **[D20**= -637 (c= 0.1, CHCl3). **1H NMR (300 MHz):** 8.38 (s, 1H, NH), 4.88 (m, 1H, Cp-H), 4.39 (s, 5H, Cp´-H), 4.19 (t, 1H, *J*= 2.6 Hz, Cp-H), 4.16 (m, 1H, Cp-H), 3.07 (s, 3H, Me), 1.22 (s, 9H, *t*-Bu). **13C-RMN:** 99.1, 71.6, 68.4, 65.7, 64.9, 61.7, 57.1, 40.6, 22.8. **MS (EI)**: *m*/*z* (%)= 383 (M+, 45), 327 (66), 309 (59), 230 (100), 200 (46), 165 (45), 121(45), 57 (45). **Anal. Calcd for C15H21FeNO3S2**: C, 47.00; H, 5.52; N, 3.65; S, 16.73. **Found**: C, 47.29; H, 5.30; N, 3.41; S, 16.51.

**General procedure for the reduction of the sulfinyl group: Synthesis of (*RFc, RS*)-1-(*tert*-Butylsulfenyl)-2-[*N*-(*p*-tolylsulfonyl)amino]ferrocene (2m)**

To a solution of **2h** (138 mg, 0.30 mmol) and NaI (22 mg, 0.90 mmol) in acetone (4.2 mL) at –40 ºC was added (CF3CO)2O (252 mg, 1.2 mmol). The reaction mixture was stirred for 2 min and Na2SO3 (2 mL), NaHCO3 (2 mL) was added. The organic layer was separated and the aqueous layer was extrated with CH2Cl2 (2 x 8 mL). The combined organic layers were dried (Na2SO4), filtered and evaporated. The resulting mixture was purified by flash chromatography (ethyl acetate-hexane 1:6) to afford the thioether **2m** (118 mg, 89%).

**Mp.** 103º-104ºC. **[D20**= -451 (c= 0.08,CHCl3). **1H NMR (300 MHz):** 7.82 (d, 2H, *J*= 8.3 Hz, Ar), 7.30 (d, 2H, *J*= 8.1 Hz, Ar), 6.30 (s, 1H, NH), 4.70 (dd, 1H, *J*= 2.6, 1.4 Hz, Cp-H), 4.20 (dd, 1H, *J*= 2.4, 1.4 Hz, Cp-H), 4.06 (t, 1H, *J*= 2.6 Hz, Cp-H), 3.95 (s, 5H, Cp’-H), 2.40 (s, 3H, Me), 1.06 (s, 9H, *t*-Bu). **13C-RMN:**143.9, 136.9, 129.6, 127.4, 98.7, 71.7, 70.7, 65.0, 64.7, 60.4, 46.6, 30.5, 21.5. **MS (EI)**: *m*/*z* (%) = 443 (M+, 72), 387 (74), 232 (100), 166 (57), 121 (19), 91 (16), 57 (32). **Anal. Calcd for C21H25FeNO2S2**: C, 56.88; H, 5.68; N, 3.16; S, 14.46. **Found**: C, 57.28; H, 5.81; N, 3.02; S, 13.98.

**(*RFc,RS*)-1-(*tert*-Butylsulfenyl)-2-[*N*-(*p*-methoxyphenylsulfonyl)amino]ferrocene (2n)**

Starting sulfoxide: **2i**.

Eluent: ethyl acetate-hexane (1:6). Yield: 74%.

**Mp.** 124-125 ºC. **[D20**= -310 (c= 0.5,CHCl3). **1H NMR (300 MHz):** 7.87 (d, 2H, *J*= 9.3 Hz, Ar), 6.96 (d, 2H, *J*= 8.9 Hz, Ar), 6.28 (s, 1H, NH), 4.77 (dd, 1H, *J*= 2.8, 1.2 Hz, Cp-H), 4.21 (dd, 1H, *J*= 2.4, 1.6 Hz, Cp-H), 4.06 (dd, 1H, *J*= 2.8, 2.4 Hz, Cp-H), 3.98 (s, 5H, Cp’-H), 3.85 (s, 3H, Me), 1.07 (s, 9H, *t*-Bu). **13C-RMN:**163.2, 131.5, 129.5, 114.2, 98.7, 71.8, 70.7, 65.0, 64.7, 60.3, 55.6, 46.7, 30.5. **MS (EI)**: *m*/*z* (%) = 459 (M+, 85), 403 (78), 273 (11), 232 (100), 166 (53). **Anal. Calcd for C21H25FeNO3S2**: C, 54.90; H, 5.49; N, 3.05; S, 13.96. **Found**: C, 54.93; H, 5.50; N, 2.91; S, 13.59.

**General procedure for the enantioselective addition of diethylzinc to aldehydes: Synthesis of (*R*)-3**

To a solution of ligand **2i** (7.6 mg, 0.02 mmol) in toluene (1 mL) under argon atmosphere was added a solution of diethylzinc 1 M in hexanes (0.66 mL, 0.66 mmol) at rt. After stirring for 30 min, benzaldehyde (35 mg, 0.33 mmol) was added and the reaction mixture was stirred at rt for 2 days (the disappearance of the aldehyde was monitored), the mixture was quenched with 5% aq. HCl (5 mL) and the mixture was extracted with diethyl ether (2x5 mL). The combined organic layers were washed with brine, dried (MgSO4), filtered and evaporated. The resulting mixture was purified by flash chromatography (ethyl acetate-hexane 1:6) to afford (*R*)-**3** (37 mg, 82%, [D20= +39 (c= 4.6,CHCl3), 82% ee, HPLC: Daicel Chiracel OD, *i*-PrOH/Hexane 5/95, flow rate 1 mL/min, *t*R: 14.8 min (*R*)-isomer and 16.3 min (*S*)-isomer, detection at 254 nm).

The same procedure (reaction times of 1-4 days) was applied to the preparation of alcohols **4**-**9**.

1. a) Lagneau, N. M.; Chen, Y.; Robben, P. M.; Sin, H.-S.; Takasu, K.; Chen, J.-S.; Robinson, P. D.; Hua, D. H. *Tetrahedron* **1998**, *54*, 7301. b) Diter, P.; Samuel, O.; Taudien, S.; Kagan, H. B. *Tetrahedron: Asymmetry* **1994**, *5*, 549. [↑](#footnote-ref-2)
2. Cogan, D. A.; Liu, G.; Kim, K.; Backes, B. J.; Ellman, J. A. *J. Am. Chem. Soc.* **1998**, *120*, 8011 [↑](#footnote-ref-3)
